# Supplementary material
Source: publisher figshare collection journal article supplement (https://brill.figshare.com/ndownloader/files/38657498)
Supplement: Supplementary file 1 [file 38657498]

## Sheet: US_Horror_Trailers_ASE_Sample
Table S1. A full list of the trailers in the sample used in this study and the URLs of each trailer on YouTube.
Title	URL
A_Haunted_House	https://www.youtube.com/watch?v=J50vA5VLR6k
A_Haunted_House_2	https://www.youtube.com/watch?v=CCIgx7j7teM
Abraham_Lincoln_Vampire_Hunter	https://www.youtube.com/watch?v=wZp7eBStN1U
Annabelle	https://www.youtube.com/watch?v=Mh_5zY42zJw
Cabin_in_the_Woods	https://www.youtube.com/watch?v=NsIilFNNmkY
Carrie	https://www.youtube.com/watch?v=qSn7JyijA8k
Chernobyl_Diaries	https://www.youtube.com/watch?v=Uy1ay369Jiw
Crimson_Peak	https://www.youtube.com/watch?v=6yAbFYbi8XU
Dark_Shadows	https://www.youtube.com/watch?v=N6tVdffCr_M
Deliver_Us_From_Evil	https://www.youtube.com/watch?v=YWDM_p68HAQ
Devils_Due	https://www.youtube.com/watch?v=hjo7iO6Ghtg
Dont_Be_Afraid_of_the_Dark	https://www.youtube.com/watch?v=mFE4lGvRt8E
Dream_House	https://www.youtube.com/watch?v=XFxIYqcmRxc
Evil_Dead	https://www.youtube.com/watch?v=TVWQmdKmct4
Final_Destination_5	https://www.youtube.com/watch?v=PI87-0g_SI8
Fright_Night	https://www.youtube.com/watch?v=txgGhyjPZGg
Goosebumps	https://www.youtube.com/watch?v=OMJ-zaoq8y8
Insidious	https://www.youtube.com/watch?v=zuZnRUcoWos
Insidious_Chapter_2	https://www.youtube.com/watch?v=fBbi4NeebAk
Insidious_Chapter_3	https://www.youtube.com/watch?v=7DNXUvHm-S8
Krampus	https://www.youtube.com/watch?v=h6cVyoMH4QE
Mama	https://www.youtube.com/watch?v=7Am7i7uM9r0
Oculus	https://www.youtube.com/watch?v=dYJrxezWLUk
Ouija	https://www.youtube.com/watch?v=_T1Jj1inE8M
Paranormal_Activity_3	https://www.youtube.com/watch?v=vKM4-87y8rw
Paranormal_Activity_4	https://www.youtube.com/watch?v=89PboIQlu1c
Paranormal_Activity_The_Ghost_Dimension	https://www.youtube.com/watch?v=zR2cc1BwdmI
Paranormal_Activity_The_Marked_Ones	https://www.youtube.com/watch?v=ccE9LeAbPU4
Poltergeist	https://www.youtube.com/watch?v=HD2sz9RVzfM
Priest	https://www.youtube.com/watch?v=MWWiCgXjTiU
Scream_4	https://www.youtube.com/watch?v=UlaZfOiGaCU
Shark_Night_3D	https://www.youtube.com/watch?v=c38GMlPPCTA
Silent_Hill_Revelation_3D	https://www.youtube.com/watch?v=9b4iOhWswYM
Sinister	https://www.youtube.com/watch?v=_kbQAJR9YWQ
Sinister_2	https://www.youtube.com/watch?v=fChx_YZUAR0
Texas_Chainsaw_3D	https://www.youtube.com/watch?v=75TvtJIbbNY
The_Conjuring	https://www.youtube.com/watch?v=k10ETZ41q5o
The_Devil_Inside	https://www.youtube.com/watch?v=MVpcszlYT7s
The_Gallows	https://www.youtube.com/watch?v=RRoCXrPAe-Y
The_House_at_the_End_of_the_Street	https://www.youtube.com/watch?v=cLHzI87v4RI
The_Last_Exorcism_Part_II	https://www.youtube.com/watch?v=0h8eyHaoNMA
The_Lazarus_Effect	https://www.youtube.com/watch?v=1Ks6JqLzVTA
The_Possession	https://www.youtube.com/watch?v=WVjggWQRlQQ
The_Raven	https://www.youtube.com/watch?v=7lzFIcfdH7g
The_Rite	https://www.youtube.com/watch?v=_hG3ktopqv8
The_Thing	https://www.youtube.com/watch?v=Txjm94GnrPA
The_Woman_in_Black	https://www.youtube.com/watch?v=VnY0fEV30Wk
The_Woman_in_Black_2	https://www.youtube.com/watch?v=5-a8bWi4LO0
Unfriended	https://www.youtube.com/watch?v=M17V9s_XKtE
Youre_Next	https://www.youtube.com/watch?v=ufUQWpEkbf0
